# Supplementary material
Source: Research Square preprint supplement (doi:10.21203/rs.3.rs-9405995/v1)
Supplement: Supplementary file 1 [file 45e2e5f4f8f0d3d275bbccdb.docx]

# Study protocol

**An exploratory clinical trial of efficacy and safety of a two-target implantable neurostimulation system for the Treatment of Autism Spectrum Disorder (ASD)**

Major research institutions: The 900th Hospital of the Chinese People's Liberation Army Joint Logistic Support Force

The principal investigators: Bangqing Yuan

Statistical analysis institution: Zhujiang Hospital, Southern Medical University

Version Number: V2.2

Version Date: 21 March 2026

Confidentiality Statement

All information contained in this research protocol is the property of the investigators of this project and is provided solely for review by the Ethics Committee and relevant authorities. No information should be disclosed to any third party not involved in this study without the prior written consent of the Principal Investigator (PI).

Amendment Note (V2.2)

This version provides an administrative clarification of the study timeline and ethics-related documentation based on the actual study conduct records. No substantive changes were made to the originally approved eligibility criteria, intervention procedures, endpoints, or statistical analysis plan.

Principal Investigator's Protocol Signature Page

Version Number: V2.2
Version Date: 21 March 2026

Title: An Exploratory Clinical Trial of the Efficacy and Safety of a Two-Target Implantable Neurostimulation System for the Treatment of Autism Spectrum Disorder (ASD)

Principal Investigator's Consent to the Protocol:

I have carefully read this protocol, agree with all its contents, and consent to execute the study as described in the protocol.

I understand that the study cannot commence without the approval of the Ethics Committee; that informed consent and corresponding documentation must be obtained from all study participants; that the study must be conducted in accordance with the ethical principles outlined in the Declaration of Helsinki and relevant clinical research laws and regulations; and that full compliance with the institution's relevant regulations is required.

Principal Investigator's Name Signature Date

**Contents**

[Study protocol 1](#_Toc11706)

[Schedule of Visits 6](#_Toc27741)

[1. Introduction 8](#_Toc7777)

[2. Objective 12](#_Toc21629)

[3. Hypothesis 12](#_Toc19419)

[4. Study Design 12](#_Toc24090)

[5. Sample Size 12](#_Toc11783)

[6. Recruitment 12](#_Toc6969)

[7. Participants 12](#_Toc10725)

[8. Intervention 13](#_Toc29576)

[9. Research Process 15](#_Toc3164)

[10. Withdrawal from the Study or Termination of Study Treatment 17](#_Toc7318)

[11. Evaluation Indicators 18](#_Toc26616)

[11.1 Primary Endpoints 18](#_Toc11539)

[11.2 Secondary Endpoints 18](#_Toc21939)

[11.3 Other Evaluation Indicators 18](#_Toc27375)

[12. Study Product Management 18](#_Toc22803)

[12.1 Receipt and Storage of Study Products 18](#_Toc13198)

[12.2 Use and Retrieval of Study Products 18](#_Toc27163)

[13. Adverse Events, Serious Adverse Events, and Adverse Reactions 18](#_Toc5733)

[14. Data Management 21](#_Toc31716)

[15. Statistical analysis 21](#_Toc15808)

[16. Quality Control and Assurance 22](#_Toc19671)

[17. Compliance and Ethical Considerations 22](#_Toc24194)

[18. Timeline 23](#_Toc30174)

[19. Reference 23](#_Toc28447)

**Study protocol**

| **Title** | An exploratory clinical trial of efficacy and safety of a two-target implantable neurostimulation system for the Treatment of Autism Spectrum Disorder (ASD) |
| --- | --- |
| **Major research institutions** | The 900th Hospital of the Chinese People's Liberation Army Joint Logistic Support Force |
| **Objective** | Primary Objective: To investigate the efficacy of ALIC-NAc dual-target DBS treatment for Autism Spectrum Disorder  Secondary Objective: To investigate the safety of ALIC-NAc dual-target DBS treatment for Autism Spectrum Disorder |
| **Hypothesis** | ALIC-NAc dual-target DBS treatment for Autism Spectrum Disorder is safe and effective |
| **Study Design** | Single-arm exploratory pilot study |
| **Sample Size** | 12 patients |
| **Participants** | Diagnostic Criteria:  The diagnostic criteria for Autism Spectrum Disorder (ASD) as defined by the American Psychiatric Association in the Diagnostic and Statistical Manual of Mental Disorders, Fifth Edition (DSM-5) are as follows:  A. Deficits in social communication: Lack of emotional social interaction; nonverbal communication deficits; difficulty in forming interactive relationships with peers and others.  B. Deficits in restricted interests and repetitive behaviors: Repetitive speech/movements or repetitive use of objects; insistence on routines or rituals; intense and restricted interests; abnormal sensory responses, interests, and reactions.  Inclusion Criteria:  Children and adolescents aged 7 to 18 years, of any gender;  Meet the diagnostic criteria for Autism Spectrum Disorder as defined by the DSM-5;  Disease duration ≥ 5 years, with no effective response to systematic behavioral interventions or training, or unable to undergo training;  The guardian, after being fully informed about the study's purpose, content, expected treatment, and risks, agrees to the participant undergoing implantable neurostimulation system treatment and signs the informed consent form.  Exclusion Criteria:  Patients with substance dependence in the past 6 months, except for tobacco;  Individuals with severe or unstable cardiovascular, respiratory, liver, kidney, hematologic, endocrine, neurological, or other systemic diseases;  Those who have had cochlear implants, pacemakers, defibrillators, previously implanted unilateral or bilateral similar devices, or have undergone other surgical procedures within the past six months that the investigator believes may affect the study;  Currently participating in or have participated in other drug or medical device clinical trials within 3 months before screening;  Other individuals deemed unsuitable for participation in this clinical study by the investigator. |
| **Primary Intervention** | Participants who meet the inclusion criteria will undergo ALIC-NAc dual-target DBS treatment. |
| **Follow-up** | Screening Period: Day -30 ± 6 days  Baseline Period (Pre-Surgery Implantation): Week 0 + 3 days  Stimulus Onset: Week 4 ± 6 days  Follow-up Observations: Week 8 ± 6 days, Week 16 ± 6 days, Week 28 ± 6 days |
| **Outcomes** | Primary outcomes: the efficacy of the therapy, assessed using NPT (Neuropsychological tests). The core symptom severity of ASD was evaluated using CARS and AuBC, while caregivers assessed changes in patients' ASD symptoms during treatment using ATEC. Additionally, the severity of abnormal behaviors was assessed using AbBC and RBS-R.  Secondary outcomes: The secondary outcomes included evaluation of the overall disease status and functioning using GAF, CGI-SI, and CGI-GI scales. Changes in LFP signals within the nucleus during the follow-up period were assessed through power values across classic frequency bands in the power spectral density  Safety outcomes: Incidence of adverse outcomes related to ALIC-NAc dual-target DBS implantation or stimulation, including bleeding, infection, device rejection, dizziness, headache, severe mood changes, and discomfort, from DBS implantation to 6 months post-stimulation. |
| **Statistical analysis** | Efficacy analyses were performed in the primary analysis set, and safety analyses were performed in the full analysis set. Non-parametric Friedman tests were used to analyze differences between visits for NPT and LFP results, with Monte Carlo simulations at a 99% confidence level for statistical modeling. Post-hoc analyses were conducted using non-parametric paired tests. SPSS version 25 was used for statistical analysis, with a two-tailed significance level of 0.05. |
| **Updated Study Timeline Based on Actual Study Records** | Trial registration date: May 27, 2024 First participant informed consent: May 27, 2024 First participant implantation: May 29, 2024 Last participant implantation: May 23, 2025 Last participant follow-up completion: January 3, 2026 |

# Schedule of Visits

|  | **Screening period** | **Intervention FOLLOW-UP PERIOD** | | **Observational FOLLOW-UP PERIOD** | | | **Withdrawal from the visit** |
| --- | --- | --- | --- | --- | --- | --- | --- |
| **Enrollment** | **Visit 1** | **Visit 2** | **Visit 3** | **Visit 4** |
| Stage of visit | VS | V0 | V1 | V2 | V3 | V4 |
| Time of visit | -30 days ± 6 days | 0 days | 4 weeks ± 6 days | Week 8 ± 6 days | Week 16 ± 6 days | Week 28 ± 6 days |
| Written Informed Consent | √ | - | - | - | - | - | - |
| Primary Outcomes a | - | - | √ | √ | √ | √ | √ |
| Secondary Outcomes b | - | √ | √ | √ | √ | √ | √ |
| Demographic Information c | √ | - | - | - | - | - | - |
| Medical History d | √ | - | - | - | - | - | - |
| Vital Signs e | √ | - | √ | √ | √ | √ | √ |
| Physical Examination f | √ | - | √ | √ | √ | √ | √ |
| Past/Concurrent Medications | √ | √ | √ | √ | √ | √ | √ |
| Adverse Events | √ | √ | √ | √ | √ | √ | √ |
| Comorbidity | √ | √ | √ | √ | √ | √ | √ |
| Other Treatments | √ | √ | √ | √ | √ | √ | √ |
| Local Field Potentials | - | - | √ | √ | √ | √ | - |

a. the Childhood Autism Rating Scale (CARS), Autism Treatment Evaluation Checklist (ATEC), Autism Behavior Checklist (AuBC), Aberrant Behavior Checklist (AbBC), Repetitive Behavior Scale–Revised (RBS-R);

b. Global Assessment of Function (GAF), Clinical Global Impression-Severity of Illness (CGI-SI), and Clinical Global Impression-Global Improvement (CGI-GI)；

c. Demographic Information: Gender, birth date, ethnicity, height, weight, head circumference.

d. Medical History: Including Autism Spectrum Disorder and other clinically significant past and present medical history, relevant medication/surgery history.

e. Vital Signs: Respiration, pulse, blood pressure, heart rate, temperature.

f. Physical Examination: General condition, abdomen, head and neck, eyes, ears, nose, throat, chest, heart/cardiovascular, gastrointestinal/liver, musculoskeletal/extremities, skin, thyroid/neck, lymph nodes, neurological/psychiatric examination.

# **1**. **Introduction**

Autism Spectrum Disorder (ASD), also known as autism or autistic disorder, is an early neurodevelopmental disorder characterized primarily by social impairments, repetitive and stereotyped behaviors, and language difficulties [1]. According to the Global Burden of Disease (GBD) study, the number of children under five with autism worldwide exceeds 603,750. The "China Autism Education and Rehabilitation Industry Development Status Report IV" published in 2022 indicates that the incidence of ASD in newborns in China is approximately 1%. However, considering regional factors and traditional stigma, industry experts generally believe the actual incidence may range from 1.0% to 1.2%, with the total number of affected individuals exceeding 10 million, including over 2 million children under 12 [2]. The exact causes of ASD remain unclear, although genetic factors, brain structural and functional abnormalities have been confirmed to be associated with ASD, there is no consensus [3].

Currently, behavioral therapy is the primary treatment for ASD, focusing on early intervention for children's behaviors, including music therapy, cognitive behavioral therapy, and social behavior therapy. These therapies aim to improve self-care and social skills but are only effective for children with mild ASD [4]. For children exhibiting severe self-injurious behavior, depression, and other issues, medication intervention is required. Medications are primarily used to improve mental state, stabilize mood, and reduce self-injurious behavior, but they are nearly ineffective in improving cognitive functions [5]. Both behavioral and pharmacological treatments have shown minimal improvement in severe ASD patients [6]. ASD is associated with numerous comorbid conditions, including obsessive-compulsive behaviors, self-injury, epilepsy, gastrointestinal disorders, immune dysregulation, and mood disorders [7]. Obsessive-compulsive behaviors affecting communication and social interaction often persist throughout life [8], and the incidence of severe self-injury can be as high as 50% [9]. The occurrence rates of medication-resistant obsessive-compulsive behaviors and self-injurious behaviors are 17% and 32%, respectively [10], suggesting a need for more potent treatment options to address these symptoms.

Deep Brain Stimulation (DBS) is a surgical treatment method designed to achieve therapeutic effects by applying electrical pulses to specific brain structures and neural circuits, altering the excitability of neuronal clusters. Over the years, DBS has been shown to be effective in treating various psychiatric disorders, including depression, anorexia, and obsessive-compulsive disorder (OCD) [11].

To date, literature has reported several DBS targets for autism, including the nucleus accumbens, internal globus pallidus, anterior limb of the internal capsule, ventral anterior limb of the internal capsule, basolateral amygdala, ventral striatum, medial forebrain bundle, and posterior hypothalamus. According to the latest review as of May 2023, no significant adverse reactions or events were observed in 16 ASD patients following DBS surgery, and there was noticeable clinical improvement in psychopathological scales [12]. As detailed in Table 1, among these 16 patients—4 minors and 12 adults—age did not significantly affect clinical symptom improvement. The clinical outcomes varied across different targets; while ALIC and PHyp showed transient efficacy, NAc and ALIC were particularly effective in treating obsessive-compulsive symptoms and/or self-injurious behaviors.

Due to the limited number of DBS treatment cases, further prospective clinical studies are needed to explore the optimal DBS targets and efficacy for ASD. It is hypothesized that different subtypes or comorbidities of ASD may require different therapeutic targets and neurostimulation parameters. Existing reports suggest that ALIC-NAc DBS can significantly reduce OCD symptoms (with an average reduction of 33% on the Yale-Brown Obsessive Compulsive Scale and 40% complete remission) [13], though 35% of patients experienced sudden increases in anxiety and anhedonia following acute cessation of stimulation [14]. DBS targeting the nucleus accumbens has been reported to reduce compulsive and aggressive behaviors in ASD [15].

Based on previous studies, this research selects the anterior limb of the internal capsule combined with the nucleus accumbens (ALIC-NAc) as the target for treating autism with severe obsessive-compulsive symptoms and self-injurious behaviors. It is hypothesized that combined stimulation of ALIC-NAc can effectively improve clinical symptoms in autism patients, aiding better social adaptation and improving social interaction difficulties

**Table 1: Summary of Studies on Deep Brain Stimulation for Autism Spectrum Disorder [12]**

| **References** | **Age/Sex** | **Diagnosis and Comorbidities** | **Indication for DBS Surgery** | **DBS Target** | **Pre-DBS Score** | **Post-DBS Score** | **Primary Outcomes** |
| --- | --- | --- | --- | --- | --- | --- | --- |
| Segar et al[16] | 24, F | KS, OCD, ASD,epilepsy | Bite hands and scratch skin | NAc | GAF 20 | GAF 50-60 | Compulsive behaviors, auxiliary speech, language, and social interactions improved |
| Doshi et al[17] | 42, F | OCD, ASD,  epilepsy | OCD, attack | NAc | Y-BOCS 19,HAMD 20,  HAS 30,SCQ 26 | Y-BOCS 5,HAMD 15,  HAS 18,SCQ 16 | Ocd symptoms, aggressive behavior, eye contact, and appropriate laughter improved significantly |
| Park et al[18] | 13, M | ASD, Delay in development | Self-harm | NAc | CGI-S 6;ABC 106;  CY-BOCS 22;K-ARS 54;  SRS 101 | CGI-S 4;ABC 40;  CY- BOCS 7;K-ARS 36;  SRS 98 | SIB decreased and verbal communication improved |
| Stocco et al[19] | 19, F | ASD, ID,The 2q monomer and the 20p trisomy | Self-scratching skin, severe stereotyping | GPi | JHMRS 46 | JHMRS 4 | SIB and dystonia were significantly improved |
|  | 17, M | ASD,ID,epilepsy | Punching, kicking, biting, stereotyping | GPi and ALIC | JHMRS 67 | JHMRS 19 | There was an initial significant improvement in SIB, but after 6 months the benefit disappeared and there was no recovery |
| Kakko et al[20] | 19, M | ASD, ID, epilepsy, TD | Aggression, self-harm | GPi | NR | NR | TD symptoms were significantly improved. Anxiety and behavioral symptoms resolved |
| Sturm et al[21] | 13, M | Kanner's autism, ID, infantile cerebral palsy | self-harm | Lateral amygdala | NR | NR | SIB and autism spectrum showed a reduction in core symptoms in the emotional, social, and cognitive domains |
| Davis et al[22] | 44, M | OCD, ASD, MDD,Convulsion，epilepsy | OCD, Aggression | Ventral internal capsule/ventral striatum | Y-BOCS,MADRS,  YGTSS | 68% reduction in Y-BOCS, 66% reduction in MADRS and 75% reduction in YGTSS | Clinical improvement was maintained and, despite fluctuations after 3 years, had no effect on the core symptoms of ASD |
| Graat et al[23] | 39, F | OCD, ASD,depression | OCD | vALIC | Y-BOCS 33, HAMD 27 | Y-BOCS 12, HAMD 7 | Obsessive-compulsive symptoms were reduced by 50% after surgery |
|  | 54, F | OCD, ASD | OCD | vALIC, MFB | Y-BOCS 38, HAMD 30 | Y-BOCS 18, HAMD 4 | Did not initially benefit from DBS. Thereafter, OCD symptoms improved and decreased by more than 50% |
|  | 32, M | OCD, ASD, ADHD | OCD, Aggression | vALIC | Y-BOCS 31, HAMD 18 | Y-BOCS 23, HAMD 12 | Part of the response may be due to some transient side effects of DBS |
|  | 31, F | OCD, ASD, DD,  OCPD, AN | OCD | vALIC | Y-BOCS 34, HAMD 30 | Y-BOCS 32, HAMD 27 | Only some subjective improvements |
|  | 51, M | OCD, ASD | OCD | MFB | Y-BOCS 34, HAMD 5 | Y-BOCS 0, HAMD 2 | Obsessive-compulsive symptoms disappeared completely. Increase self-confidence and reduce social shyness |
|  | 30, F | OCD, ASD, PDD, GAD, UPD | OCD | MFB | Y-BOCS 34, HAMD 23 | Y-BOCS 22, HAMD 22 | Ocd symptoms were reduced by 35% after DBS |
| Benedetti-Isaac et al[24] | 27, M | ASD, TBI, epilepsy | Self-harm | PHyp | OAS 9 | OAS 1 | Seizures, aggressive behavior, quality of life, and improvement in daily living skills |
|  | 16, M | ASD, epilepsy, Delay in development | Self-harm | PHyp | OAS 8 | OAS 1 | Aggression was controlled for one month. It recurred 2 months later and was the same as before surgery |

ABC (Antecedent, Behavior, Consequence), ADHD (Attention-Deficit/Hyperactivity Disorder), ALIC (Anterior Limb of Internal Capsule), AN (Anorexia Nervosa), ASD (Autism Spectrum Disorder), CGI-S (Clinical Global Impression-Severity), CY-BOCS (Children's Yale-Brown Obsessive Compulsive Scale), DBS (Deep Brain Stimulation), DD (Depression Disorder), F (Female), GAD (Generalized Anxiety Disorder), GAF (Global Assessment of Functioning), GPi (Globus Pallidus Internus), HAMD (Hamilton Depression Scale), HAS (Hamilton Anxiety Scale), ID (Intellectual Disability), JHMRS (Johns Hopkins Motor Stereotypy Rating Scale), K-ARS (Korean Attention-Deficit/Hyperactivity Disorder Rating Scale), KS (Kleefstra Syndrome), M (Male), MADRS (Montgomery-Asberg Depression Rating Scale), MDD (Major Depressive Disorder), MFB (Medial Forebrain Bundle), NAc (Nucleus Accumbens), NR (Not Reported), OAS (Overt Aggression Scale), OCD (Obsessive-Compulsive Disorder), OCPD (Obsessive-Compulsive Personality Disorder), PDD (Persistent Depressive Disorder), PHyp (Posterior Hypothalamus), SCQ (Social Communication Questionnaire), SRS (Social Responsiveness Scale), TBI (Traumatic Brain Injury), TD (Tardive Dyskinesia), UPD (Unspecified Personality Disorder), vALIC (Ventral Anterior Limb of Internal Capsule), Y-BOCS (Yale-Brown Obsessive Compulsive Scale), YGTSS (Yale Global Tic Severity Scale).

# 2. Objective

### 2.1 Primary Objective

To investigate the effect of **ALIC-NAc DBS** on the improvement of symptoms in **ASD** patients, specifically by assessing the changes in **NPT** scores at 1 month, 3 months, and 6 months after stimulation compared to baseline.

### 2.2 Secondary Objectives

To evaluate the overall disease status and functioning. Additionally, to assess changes in **LFP** signals within the nucleus during the follow-up period.

**2.3 Safety outcomes:**

To evaluate the safety of ALIC-NAc DBS in patients with ASD.

# 3. Hypothesis

ALIC-NAc dual-target DBS treatment for Autism Spectrum Disorder is safe and effective.

# **4.** Study Design

Single-arm exploratory pilot study.

# **5.** Sample Size

12 patients.

# 6. Recruitment

The Fujian Disabled Persons Federation or treatment centers for children with ASD

# 7. Participants

**7.1 Diagnostic Criteria:**

The diagnostic criteria for Autism Spectrum Disorder (ASD) as defined by the American Psychiatric Association in the Diagnostic and Statistical Manual of Mental Disorders, Fifth Edition (DSM-5) are as follows:

A. Deficits in social communication: Lack of emotional social interaction; nonverbal communication deficits; difficulty in forming interactive relationships with peers and others.

B. Deficits in restricted interests and repetitive behaviors: Repetitive speech/movements or repetitive use of objects; insistence on routines or rituals; intense and restricted interests; abnormal sensory responses, interests, and reactions.

**7.2 Inclusion Criteria**

Children and adolescents aged 7 to 18 years, of any gender;

Meet the diagnostic criteria for Autism Spectrum Disorder as defined by the DSM-5;

Disease duration ≥ 5 years, with no effective response to systematic behavioral interventions or training, or unable to undergo training;

The guardian, after being fully informed about the study's purpose, content, expected treatment, and risks, agrees to the participant undergoing implantable neurostimulation system treatment and signs the informed consent form.

**7.3 Exclusion Criteria**

Patients with substance dependence in the past 6 months, except for tobacco;

Individuals with severe or unstable cardiovascular, respiratory, liver, kidney, hematologic, endocrine, neurological, or other systemic diseases;

Those who have had cochlear implants, pacemakers, defibrillators, previously implanted unilateral or bilateral similar devices, or have undergone other surgical procedures within the past six months that the investigator believes may affect the study;

Currently participating in or have participated in other drug or medical device clinical trials within 3 months before screening;

Other individuals deemed unsuitable for participation in this clinical study by the investigator.

# 8. Intervention

Participants who meet the inclusion criteria will undergo implantation of the ALIC-NAc dual-target DBS device.

### 8.1 Description of the Intervention

Prior to surgery, a surgical plan will be developed based on imaging results, targeting the **ventral NAc** with the trajectory passing through the ipsilateral **ALIC**. DBS electrodes will be implanted using a stereotactic system or neurosurgical robot. Extension wires and the neurostimulator will be implanted into the subcutaneous tissue.

**8.1.1 Surgical Planning and Electrode Implantation**

1. Preoperative MRI scans will be performed. On the day of the surgery, a local anesthetic will be administered to install a stereotactic head frame, followed by a CT scan. Imaging data (MRI and CT) will be fused using planning software to develop the surgical plan and locate the target.

2. Under general anesthesia, the area will be sterilized and draped, and a scalp incision will be made. A 14-mm diameter burr hole will be created using a cranial drill.

3. A skull cap base will be placed over the burr hole and secured, with a microdrive system fixed to the stereotactic frame. The microdrive system will advance the guiding tube and round-tipped probe to within 5-15 mm above the target.

4. The round-tipped probe will be removed, and a microelectrode will be inserted into the guiding tube. The microelectrode will be slowly advanced using the microdrive system while recording neural cluster firing to determine the exact target location (advancing the microelectrode by 1 mm or 0.5 mm at a time). The microelectrode will then be removed.

5. The stimulation electrode will be measured to the appropriate depth, and a depth limiter will be attached. The stimulation electrode will be inserted into the actual target location.

6. The extension cable will be connected to the stimulation electrode, and the connector end will be attached to a test stimulator. The test stimulator will be used to set specific output signals between electrode channels to test stimulation, verifying the accuracy of the electrode placement. After confirmation, the test stimulator will be disconnected, and the electrode will be detached from the extension cable.

7. A silicone plug will be used to secure the stimulation electrode, and the guiding wire will be removed from the stimulation electrode. The insertion cannula will be removed, and the adjustable depth limiter will be taken out. The stimulation electrode will be placed in the guiding groove, and the skull cap will be replaced.

8. The electrode will be coiled into a loop with a diameter greater than 25 mm to prevent bending or twisting. Any excess electrode will be coiled inside the subgaleal pouch. The incision will be sutured or covered with sterile dressing.

9. The target localization, electrode implantation, and stimulation testing procedure will be repeated for the second electrode.

**8.1.2 Creating the Subcutaneous Tunnel**

1. Under general anesthesia, make a midline incision on the top of the skull or behind the ear. Using blunt dissection, create a subcutaneous pocket approximately 1 cm below the clavicle to accommodate the neurostimulator. Place the implanted neurostimulator into the pocket to ensure a proper fit. Remove the neurostimulator and clean the surface of the device with sterile gauze to remove any blood, ensuring the neurostimulator remains clean and sterile.

2. Pass the tunneler from the scalp incision to the midline incision. Remove the guidewire and thread the tail end of the stimulation electrode through the tunneler to the midline incision. Remove the tunneler. Then, thread the extension lead tunneler from the midline incision toward the neurostimulator pocket, remove the guidewire, and thread the connection end of the implanted neurostimulator extension lead through the tunneler until the connection point emerges from the upper pocket. Completely remove the extension lead tunneler from the patient's body.

3. Connect the electrode to the extension lead, secure it using a torque screwdriver, and tie non-absorbable sutures around the binding grooves at both ends of the sheath. Create a second pocket at the midline incision site to accommodate the electrode-extension lead connection.

**8.1.3 Implanting the Neurostimulator**

1. Connect the implanted neurostimulator to the extension lead. Once confirmed, use a torque screwdriver to tighten the securing screws at both channel ports.

2. Place the neurostimulator into the subcutaneous pocket with the side displaying the etched information facing the surgeon. Wrap the extension lead around the perimeter of the rechargeable closed-loop neurostimulator. Secure the neurostimulator to the subcutaneous tissue using non-absorbable sutures, and fix it to the muscle fascia through the suturing holes in the connector component.

3. Use a programmable device and app to check the functional integrity of the implanted system.

4. Suture all incisions and apply sterile dressings.

# 9. Research Process

**9.1 Screening Phase (Vs, -30 days ± 6 days)**

During the screening visit, the following procedures will be conducted/collected:

**Informed Consent**

Provide a detailed introduction of the study to the participant, answer any questions, and obtain written informed consent.

Prior to signing the consent, any routine laboratory tests and imaging evaluations required by clinical care will be performed. If these data are available within the specified window, they can be used.

**Demographics**

Record the participant's sex, date of birth, ethnicity, height, weight, and head circumference.

**Medical History**

Include autism spectrum disorder and other clinically significant past and present medical histories.

Document relevant medication/surgical history, comorbid symptoms, and other treatments.

**Vital Signs**

Measure respiration, pulse, blood pressure, heart rate, and temperature.

**Physical Examination**

Conduct a comprehensive physical examination, including general condition, abdomen, head and neck, eyes, ears, nose, throat, chest, heart/cardiovascular, gastrointestinal/liver, musculoskeletal/extremities, skin, thyroid/neck, lymph nodes, and neurological/psychiatric examination.

**The Neuropsychological tests**

Including the Childhood Autism Rating Scale (CARS), Autism Treatment Evaluation Checklist (ATEC), Autism Behavior Checklist (AuBC), Aberrant Behavior Checklist (AbBC), Repetitive Behavior Scale–Revised (RBS-R), Global Assessment of Function (GAF), Clinical Global Impression-Severity of Illness (CGI-SI), and Clinical Global Impression-Global Improvement (CGI-GI). The AuBC, ATEC, AbBC, and RBS-R were evaluated by family members or caregivers, while the CARS, GAF, CGI-SI, and CGI-GI assessments were conducted by professional psychiatrists；

**9.2 Intervention Stage (V0, Week 0 + 3 Days)**

Participants will undergo the ALIC-NAc dual-target DBS surgical treatment.

**9.3 Follow-up Stage**

Visits 1, 2, 3, and 4 (V1, 4 Weeks ± 6 Days; V2, 8 Weeks ± 6 Days; V3, 16 Weeks ± 6 Days; V4, 28 Weeks ± 6 Days)

During each visit, the following measures will be collected:

Primary Outcome Measures: The primary outcomes will be assessed using CARS, ATEC, AuBC, AbBC, and RBS-R. These tools will evaluate changes in autism symptoms and behaviors during follow-up visits.

Secondary Outcome Measures: The secondary outcomes include GAF, CGI-SI, and CGI-GI. Changes in LFP signals from the targeted brain regions will also be monitored to assess the DBS treatment's impact on brain activity.

Safety Outcomes: Safety will be evaluated by tracking occurrences of bleeding, infection, and device rejection related to ALIC-NAc DBS implantation. Additionally, adverse effects such as dizziness, headache, severe mood changes, and discomfort from electrical stimulation will be recorded.

Vital Signs: Breathing, pulse, blood pressure, heart rate, and body temperature.

Physical Examination: General condition, abdomen, head and neck, eyes, ears, nose, throat, chest, heart/cardiovascular system, gastrointestinal/liver, musculoskeletal/extremities, skin, thyroid/neck, lymph nodes, and neurological/psychiatric examination.

Concomitant Medications: Medications used to treat comorbid conditions.

Adverse Events: All adverse medical events occurring after the administration of the investigational product, including abnormalities in laboratory tests. These events may not necessarily be related to the investigational product.

# 10. Withdrawal from the Study or Termination of Study Treatment

**10.1 Criteria for Withdrawal from the Study**

Reasons for a subject to withdraw from the study may include:

- Withdrawal of informed consent by the subject, refusal to continue with follow-up;

- Loss to follow-up;

- Death of the subject.

10.2 Criteria for Termination of Study Treatment

The criteria for terminating study treatment are as follows:

- Withdrawal of informed consent by the subject, refusal to continue with the study treatment;

- Deterioration of the subject's clinical symptoms as judged by the investigator;

- Intolerable conditions as determined by the investigator, including any clinical adverse events (AEs), abnormal laboratory findings, or other medical conditions;

- Any other situation deemed necessary for treatment termination by the investigator;

- Pregnancy;

- Termination of the study by the sponsor.

**10.3 Steps for Study Withdrawal or Termination of Study Treatment**

In the event of study withdrawal or termination of study treatment, the following steps must be taken:

- Perform efficacy and safety assessments according to the protocol for study withdrawal and final follow-up, and comprehensively record adverse events (AEs) and outcomes.

- The investigator may suggest or provide alternative treatment options to the subject based on their actual condition.

- If the subject refuses to attend further visits at the study center, their survival status should continue to be monitored, unless informed consent has been withdrawn. In such cases, no further research evaluations should be conducted, and no additional data should be collected.

# 11. Evaluation Indicators

# 11.1 Primary Endpoints

Improvement in CARS, ATEC, AuBC, AbBC, RBS-R, GAF, CGI-SI, and CGI-GI compared to baseline at 1 month, 3 months, and 6 months after device activation.

# 11.2 Secondary Endpoints

Adverse outcomes related to ALIC-NAc DBS implantation or electrical stimulation, such as bleeding, infection, device rejection, dizziness, headache, severe mood changes, or discomfort, occurring from DBS implantation to 6 months post-activation.

# 11.3 Other Evaluation Indicators

LFP signals at the target sites.

# 12. Study Product Management

# 12.1 Receipt and Storage of Study Products

Study products are provided by SceneRay (Suzhou) Co., Ltd. based on the treatment needs of study subjects. These products are received, inspected, and stored by the Instrument Department of The 900th Hospital of the Chinese People's Liberation Army Joint Logistic Support Force. SceneRay (Suzhou) Co., Ltd. provided study devices and device-related technical support only, and had no role in participant selection, clinical assessment, data analysis, interpretation of results, or manuscript preparation.

# 12.2 Use and Retrieval of Study Products

Study products used in experimental surgeries must be strictly verified and recorded. If a situation requiring retrieval occurs, it must be documented and approved for retrieval by the Instrument Department of The 900th Hospital of the Chinese People's Liberation Army Joint Logistic Support Force.

# 13. Adverse Events, Serious Adverse Events, and Adverse Reactions

**13.1 Definitions**

Adverse Event (AE): Any unfavorable medical event occurring in a subject after receiving the study product, which may include laboratory abnormalities, but does not necessarily have a causal relationship with the study product.

Serious Adverse Event (SAE): An adverse medical event that results in death, or is life-threatening, causes or worsens disability, or results in significant symptoms or signs.

Adverse Reaction: Any adverse event occurring during a clinical trial that is suspected to be related to the study product, such as bleeding related to surgery, infection, wound dehiscence, or device malfunction. There must be at least a reasonable possibility of a causal relationship between the study product and the adverse reaction, meaning that the association cannot be ruled out.

Suspected and Unexpected Serious Adverse Event (SUSAR): A serious adverse event with a nature or severity that is not anticipated based on the information available in the study product's investigator's brochure, the product's label for marketed products, or the product characteristics summary.

**13.2 Recording of Adverse Events/Serious Adverse Events**

All AEs and SAEs, including death, disability or worsening of symptoms, or laboratory abnormalities, occurring during the trial, regardless of whether they are related to the study product, must be recorded in the original records and case report forms. The recording of AEs and SAEs should include:

Event Name (Medical Terminology): The specific name of the event in medical terms.

Duration of the Event: The start and end times of the event.

Severity of the Event: The seriousness of the event.

Causal Relationship with Study Product: Assessment of whether the event is related to the study product.

Actions Taken: Any measures taken, including treatment methods and medications if applicable.

Outcome of the Event: The final result of the event.

Signature and Date of Investigator: The investigator’s signature and date of recording.

**13.3 Assessment of Adverse Events and Serious Adverse Events**

**13.3.1 Severity Classification**

Grade 1: Mild; asymptomatic or minimal; clinical or diagnostic findings only; no treatment needed.

Grade 2: Moderate; requires minor, localized, or non-invasive treatment; limits instrumental activities of daily living.

Grade 3: Severe or of significant medical importance but not immediately life-threatening; leads to hospitalization or prolongs hospital stay; causes disability; limits activities of daily living.

Grade 4: Life-threatening; requires emergency treatment.

Grade 5: Death related to the adverse event.

**13.3.2 Causal Relationship Assessment**

The investigator evaluates the potential association between the adverse event and the study product using the following criteria:

Timing: Does the onset of the adverse event follow a reasonable timeline after the start of the study product?

Known Reactions: Does the suspected adverse event match known reactions for the study product?

Alternative Explanations: Can the adverse event be explained by concurrent medications, the patient’s clinical condition, or other treatments?

Resolution: Does the adverse event resolve or improve after discontinuation or dose reduction of the study product?

Rechallenge: Does the adverse event recur with re-exposure to the study product?

Based on these principles, causal relationships are classified as follows:

Definitely Related: The event occurs in a reasonable sequence after the study product and resolves after discontinuation or reduction; re-exposure reproduces the event; other factors are excluded.

Probably Related: Similar to "Definitely Related," but may involve concurrent medications with a low likelihood of causing the event.

Possibly Related: The event is closely related in time to the study product, but multiple factors could contribute, or the underlying condition could be a factor.

Probably Not Related: The event’s timing and symptoms do not match known reactions, and the underlying condition could explain the symptoms.

Pending Evaluation: Incomplete reporting or inconclusive causal relationship, awaiting further information or literature support.

Unable to Evaluate: Too many missing details to assess the causal relationship, and additional information cannot be obtained.

**13.4 Management, Follow-Up, and Duration of Adverse Events/Serious Adverse Events**

For all adverse events and serious adverse events, the investigator should take necessary actions based on severity and follow up until resolution, return to baseline levels, confirmation of no resolution, or death.

**13.5 Laboratory Abnormalities**

The investigator must assess the clinical significance of all abnormal laboratory data obtained during the trial. Any clinically significant laboratory abnormalities must be reported and followed up until normalization. Clinically significant is defined as any abnormality that is important, requires medical intervention, or meets the definition of a serious adverse event. Further clinical observation and evaluation may be necessary to determine the significance and cause of the abnormal results. If unexplained abnormal values occur, they should be retested and followed up until they return to normal or baseline values, and/or a reasonable explanation is found. Clear explanations should be documented in the case report form.

**13.6 Reporting Serious Adverse Events**

During the clinical trial, the investigator must closely monitor the occurrence of serious adverse events. Once a serious adverse event occurs, the trial should be halted immediately, necessary measures should be taken to ensure participant safety, and the event should be reported to the ethics committee and other relevant departments within 24 hours.

# 14. Data Management

Data Collection: Data will be collected using the REDCap electronic data capture system.

Data Recording: Original medical records and Case Report Forms (CRFs) should be accurately and diligently recorded according to requirements.

Data Query and Correction: All observed results and anomalies in clinical trials should be promptly and thoroughly verified and recorded to ensure data reliability.

Quality Standards: All study products and examination items in the clinical trial must adhere to strict quality standards and be used under normal conditions. Evaluation scales used are internationally recognized, and evaluators have appropriate qualifications.

# 15. Statistical analysis

**15.1 Software**

Statistical analysis will be conducted using SPSS version 25.

**15.2 Basic principles of statistical analysis**

Efficacy analyses were performed in the primary analysis set, and safety analyses were performed in the full analysis set. Non-parametric Friedman tests were used to analyze differences between visits for NPT and LFP results, with Monte Carlo simulations at a 99% confidence level for statistical modeling. Post-hoc analyses were conducted using non-parametric paired tests. SPSS version 25 was used for statistical analysis, with a two-tailed significance level of 0.05.

**15.3 Missing Data Imputation**

Missing data will not be imputed in this study.

**15.4 Descriptive Analysis**

For categorical data, frequencies and percentages will be described. For continuous data, means and standard deviations will be reported.

**15.5 Efficacy Analysis**

Symptom assessment data will be treated as numerical variables. Due to the small sample size, non-parametric tests will be used.

**15.6 Safety Analysis**

Adverse events will be treated as binary variables. Due to the small sample size, non-parametric tests will be used.

# **16. Quality Control and Assurance**

**16.1 Standard Operating Procedures (SOPs)**

Prior to the start of the trial, the researchers will collaboratively develop Standard Operating Procedures (SOPs) to standardize operational methods, criteria, and record-keeping throughout the trial. Researchers are required to adhere strictly to the protocol.

**16.2 Training and Delegation of Responsibilities**

Before the trial begins, the principal investigator will organize a team, including physicians, nurses, and coordinators, who are matched to the study. Prior to the trial initiation, the principal investigator will provide training for all involved medical staff on the clinical trial protocol, manual, SOPs, and special considerations. If there are changes to the project processes during the trial, additional training will be organized. Accurate and complete training records must be maintained.

Responsibilities will be delegated by the principal investigator, and personnel must adhere to the delegation of responsibilities table. The principal investigator may adjust the team and responsibilities as needed during the trial, updating the delegation table accordingly. All personnel must receive adequate training before performing their duties.

**16.3 Data Management**

Case Report Forms (CRFs) must be completed accurately and conscientiously, and once filled, should not be easily altered. If corrections are necessary due to errors, the original record must not be changed; corrections should be made with additional narrative, signed, and dated by the responsible physician. All observed results and anomalies in the clinical research must be promptly and carefully verified and recorded to ensure data reliability.

**16.4 Participant Adherence Management**

Researchers should actively take measures, such as regular follow-ups, telephone/video communication, and feedback on test results, to keep the dropout rate below 10%.

# 17. Compliance and Ethical Considerations

This clinical trial was conducted in accordance with the Declaration of Helsinki and relevant Chinese regulations governing clinical research. The protocol, informed consent documents, and related study materials were reviewed and approved by the Ethics Committee before study initiation. The study was registered with the Chinese Clinical Trial Registry (ChiCTR2400084888) on May 27, 2024.
Written informed consent was obtained from the legal guardians of all participants before any study-specific procedures were performed. Age- and development-appropriate assent was considered whenever feasible in accordance with the approved ethics framework. For participants who were unable to provide meaningful assent because of severe communication or cognitive impairment, participation proceeded under guardian permission in accordance with the approved ethics framework.
Guardians were informed of the study purpose, potential benefits, foreseeable surgical and stimulation-related risks, available non-surgical alternatives, and the investigational nature of the intervention in this indication. The investigators were responsible for safeguarding participant rights, safety, and privacy throughout the study. Any protocol modifications affecting participant safety, study procedures, or informed consent documents required Ethics Committee approval before implementation.

# 18. Timeline

# March 2023 - May 2024: Ethics preparation, protocol finalization, and study registration procedures.

# May 27, 2024: Trial registration and first participant informed consent.

# May 29, 2024 - May 23, 2025: Participant implantation period.

# January 3, 2026: Completion of follow-up for the last participant.

# January 2026 onward: Data verification, signal feature extraction, statistical analysis, and manuscript preparation.

# 19. Reference

[1] Lai MC, Lombardo MV, Baron-Cohen S. Autism. Lancet. 2014 Mar 8;383(9920):896-910. doi: 10.1016/S0140-6736(13)61539-1. Epub 2013 Sep 26. PMID: 24074734.

[2] 胡荣贵,魏襄祺,张文阳. 自闭症谱系障碍研究进展[J]. 世界科学,2023(11):33-36.

[3] Vorstman JAS, Parr JR, Moreno-De-Luca D, Anney RJL, Nurnberger JI Jr, Hallmayer JF. Autism genetics: opportunities and challenges for clinical translation. Nat Rev Genet. 2017 Jun;18(6):362-376. doi: 10.1038/nrg.2017.4. Epub 2017 Mar 6. PMID: 28260791.

1. Elliott SJ, Marshall D, Morley K, Uphoff E, Kumar M, Meader N. Behavioural and cognitive behavioural therapy for obsessive compulsive disorder (OCD) in individuals with autism spectrum disorder (ASD). Cochrane Database Syst Rev. 2021 Sep 3;9(9):CD013173.
2. Hyman SL, Levy SE, Myers SM; COUNCIL ON CHILDREN WITH DISABILITIES, SECTION ON DEVELOPMENTAL AND BEHAVIORAL PEDIATRICS. Identification, Evaluation, and Management of Children With Autism Spectrum Disorder. Pediatrics. 2020 Jan;145(1):e20193447.
3. Turner M. The role of drugs in the treatment of autism.Aust Prescr, 2020, 43: 185-90.

[7] Berney TP. Autism--an evolving concept. The British journal of psychiatry : the journal of mental science. Jan 2000;176:20-25.

[8] van Steensel FJ, Bogels SM, Perrin S. Anxiety disorders in children and adolescents with autistic spectrum disorders: a meta-analysis. Clinical child and family psychology review. Sep 2011;14(3):302-317.

[9] Richards C, Oliver C, Nelson L, Moss J. Self-injurious behaviour in individuals with autism spectrum disorder and intellectual disability. J Intellect Disabil Res. 2012 May;56(5):476-89.

[10] Adler BA, Wink LK, Early M, et al. Drug-refractory aggression, self-injurious behavior, and severe tantrums in autism spectrum disorders: a chart review study. Autism : the international journal of research and practice. Jan 2015;19(1):102-106.

[11] Hirschtritt ME, Bloch MH, Mathews CA. Obsessive-Compulsive Disorder: Advances in Diagnosis and Treatment. JAMA. 2017 Apr 4;317(13):1358-1367.

[12] Marini S, D'Agostino L, Ciamarra C, Gentile A. Deep brain stimulation for autism spectrum disorder. World J Psychiatry. 2023 May19;13(5):174181.doi:10.5498/wjp.v13.i5.174. PMID: 37303931; PMCID: PMC10251363.

[13] Sinha S, McGovern RA, Sheth SA. Deep brain stimulation for severe autism: from pathophysiology to procedure. Neurosurg Focus. 2015 Jun;38(6):E3. doi: 10.3171 / 2015. 3.FOCUS1548. PMID: 26030703.

[14] Huys D, Kohl S, Baldermann JC, Timmermann L, Sturm V, Visser-Vandewalle V, Kuhn J. Open-label trial of anterior limb of internal capsule-nucleus accumbens deep brain stimulation for obsessive-compulsive disorder: insights gained. J Neurol Neurosurg Psychiatry. 2019 Jul;90(7):805-812. doi: 10.1136/jnnp-2018-318996. Epub 2019 Feb 15. PMID: 30770458.

[15] Doshi PK, Hegde A, Desai A. Nucleus Accumbens Deep Brain Stimulation for Obsessive-Compulsive Disorder and Aggression in an Autistic Patient: A Case Report and Hypothesis of the Role of Nucleus Accumbens in Autism and Comorbid Symptoms. World Neurosurg. 2019 May;125:387-391.

[16] Segar DJ, Chodakiewitz YG, Torabi R, Cosgrove GR. Deep brain stimulation for the obsessive-compulsive and Tourettelike symptoms of Kleefstra syndrome. Neurosurg Focus 2015; 38: E12 [PMID: 26030700 DOI: 10.3171/2015.3.FOCUS1528]

[17] Doshi PK, Hegde A, Desai A. Nucleus Accumbens Deep Brain Stimulation for Obsessive-Compulsive Disorder and Aggression in an Autistic Patient: A Case Report and Hypothesis of the Role of Nucleus Accumbens in Autism and Comorbid Symptoms. World Neurosurg 2019; 125: 387-391 [PMID: 30797934 DOI: 10.1016/j.wneu.2019.02.021]

[18] Park HR, Kim IH, Kang H, Lee DS, Kim BN, Kim DG, Paek SH. Nucleus accumbens deep brain stimulation for a patient with self-injurious behavior and autism spectrum disorder: functional and structural changes of the brain: report of a case and review of literature. Acta Neurochir (Wien) 2017; 159: 137-143 [PMID: 27807672 DOI: 10.1007/s00701-016-3002-2]

[19] Stocco A, Baizabal-Carvallo JF. Deep brain stimulation for severe secondary stereotypies. Parkinsonism Relat Disord 2014; 20: 1035-1036 [PMID: 25012696 DOI: 10.1016/j.parkreldis.2014.06.019]

[20] Kakko K, Bjelogrlic-Laakso N, Pihlakoski L, Lehtimäki K, Järventausta K. Tardive Dyskinesia Should Not Be Overlooked. J Child Adolesc Psychopharmacol 2019; 29: 72-74 [PMID: 30388034 DOI: 10.1089/cap.2018.0084]

[21] Sturm V, Fricke O, Bührle CP, Lenartz D, Maarouf M, Treuer H, Mai JK, Lehmkuhl G. DBS in the basolateral amygdala improves symptoms of autism and related self-injurious behavior: a case report and hypothesis on the pathogenesis of the disorder. Front Hum Neurosci 2012; 6: 341 [PMID: 23346052 DOI: 10.3389/fnhum.2012.00341]

[22] Davis RA, Winston H, Gault JM, Kern DS, Mikulich-Gilbertson SK, Abosch A. Deep Brain Stimulation for OCD in a Patient With Comorbidities: Epilepsy, Tics, Autism, and Major Depressive Disorder. J Neuropsychiatry Clin Neurosci 2021; 33: 167-171 [PMID: 33535803 DOI: 10.1176/appi.neuropsych.20060153]

[23] Graat I, Balke S, Prinssen J, de Koning P, Vulink N, Mocking R, van Rooijen G, Munckhof PVD, Schuurman R, Denys D. Effectiveness and safety of deep brain stimulation for patients with refractory obsessive compulsive disorder and comorbid autism spectrum disorder; A case series. J Affect Disord 2022; 299: 492-497 [PMID: 34952108 DOI: 10.1016/j.jad.2021.12.089]

[24] Benedetti-Isaac JC, Torres-Zambrano M, Vargas-Toscano A, Perea-Castro E, Alcalá-Cerra G, Furlanetti LL, Reithmeier T, Tierney TS, Anastasopoulos C, Fonoff ET, Contreras Lopez WO. Seizure frequency reduction after posteromedial hypothalamus deep brain stimulation in drug-resistant epilepsy associated with intractable aggressive behavior. Epilepsia 2015; 56: 1152-1161 [PMID: 26146753 DOI: 10.1111/epi.13025]
