# Supplementary material
Source: Research Square preprint supplement (doi:10.21203/rs.3.rs-9405995/v1)
Supplement: Supplementary file 2 [file d6e6547215dec9936ccd3d4f.docx]

# Supplementary Methods

**Electrophysiological Data Analysis**

In this study, custom MATLAB scripts (MathWorks, Natick, MA) were employed for electrophysiological data analysis. During preprocessing, the local field potential data were segmented into 5-second epochs and subjected to a 1 Hz fourth-order Butterworth high-pass filter and a 499 Hz low-pass filter. Line noise (40 Hz and its harmonics) was attenuated using notch filtering. The data were then visually inspected using the EEGLAB toolbox (http://www.sccn.ucsd.edu/eeglab/) to remove artifact-contaminated epochs. Power spectral density estimation was performed using the Welch method with a 0.5-s Hamming window, 50% overlap, and a 0.5-Hz resolution. Subsequently, we examined the relative band-limited power of several frequency bands commonly utilized in traditional electrophysiological analyses: delta (1-4 Hz), theta (4-8 Hz), alpha (8-13 Hz), and beta (13-30 Hz).

**Localization and reconstruction of electrodes**

Electrodes were reconstructed for each patient using the Lead-DBS toolbox (Version 3.0.1) on the MATLAB (MathWorks, Natick, MA). A postoperative computed tomography (CT) scanning was conducted one month after surgery to eliminate pneumocephalus and brain shift. The postoperative CT images were coregistered linearly with the preoperative magnetic resonance imaging using Advanced Normalization Tools in Lead-DBS. The coregistered images were normalized to Montreal Neurological Institute (MNI) Space. Electrodes and contacts were prelocalized automatically using the PaCER toolbox and verified by meticulous visual inspection. The volume of tissue activated (VTA) was modeled in the native space of each patient utilizing the finite element method. A volume conductor model comprising gray matter (σ = 0.33 S/m), white matter (σ = 0.14 S/m), electrode contacts, and insulated regions was constructed using a 4-compartment mesh.

**Supplementary Figure 1: Reconstruction of the deep brain stimulation (DBS) electrodes and volume of tissue activated (VTA).**


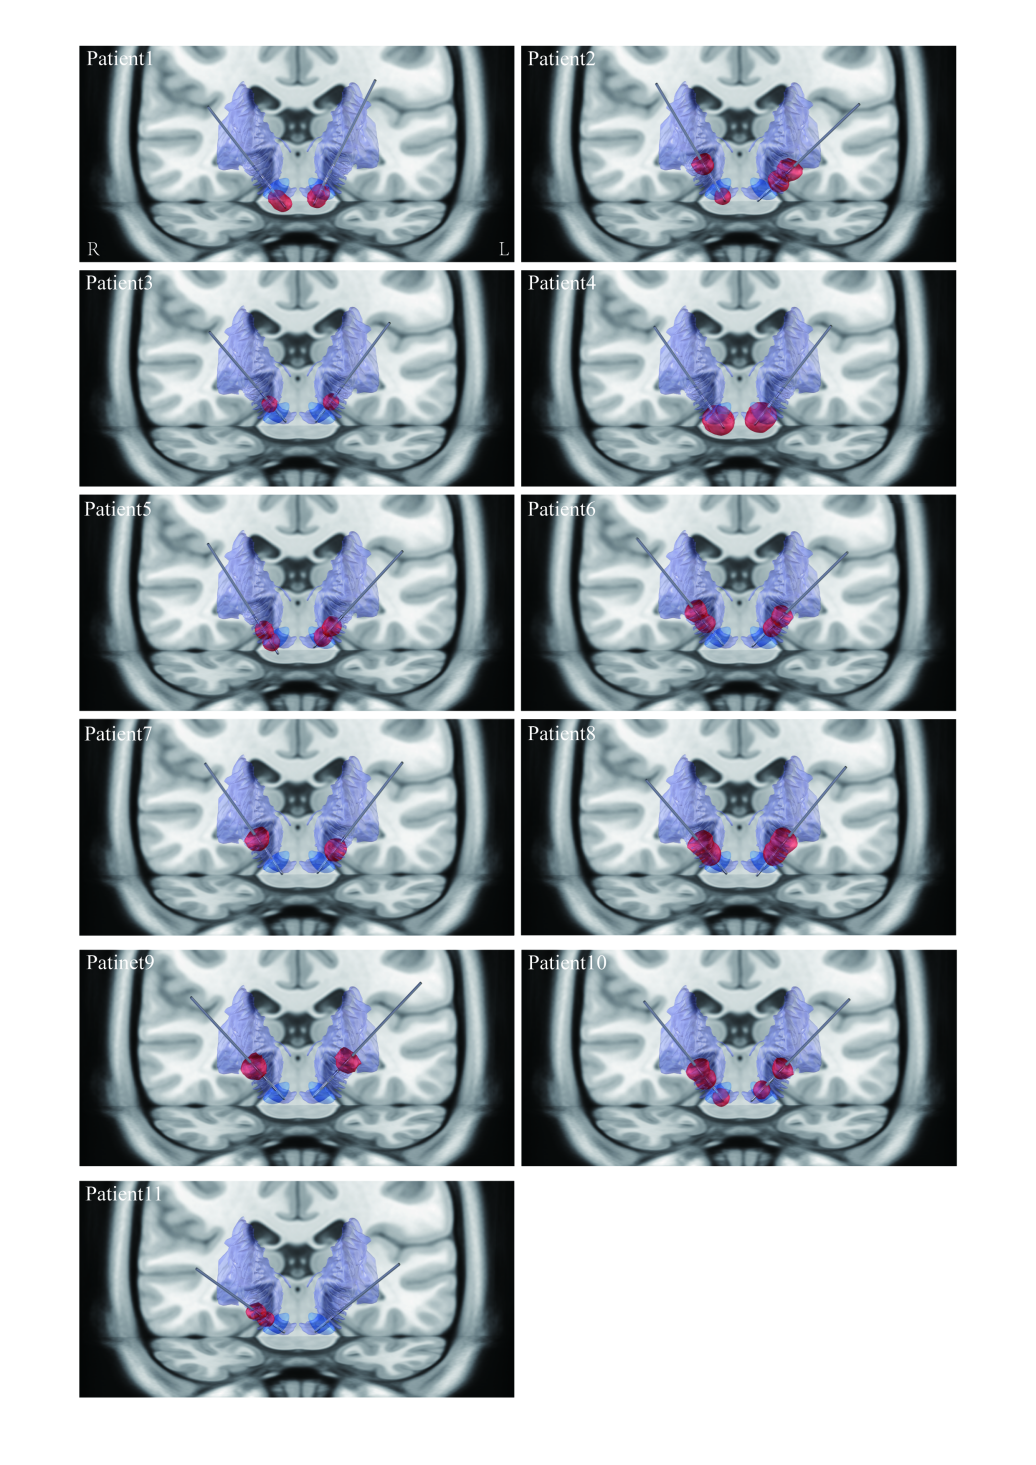


The VTA in all patients were constructed individually according to the programmed parameters at 3 months after DBS. The electrodes were merged on the T1-weighted Montreal Neurological Institute (MNI) templates, with active contacts marked in red. Masses with blue describe the location of the Nucleus accumbens, masses with purple describe the location of the internal capsule, masses with red describe the location of VTA.

**Supplementary Table 1: The programming parameters at 3 months after stimulation**

|  | **NAc** | | | | | **ALIC** | | | | |
| --- | --- | --- | --- | --- | --- | --- | --- | --- | --- | --- |
| **Left**  **Active Contacts** | **Right Active**  **Contacts** | **Amplitude (V)** | **Pulse Width**  **(μs)** | **Frequency(Hz)** | **Left**  **Active Contacts** | **Right Active**  **Contacts** | **Amplitude (V)** | **Pulse Width**  **(μs)** | **Frequency(Hz)** |
| Patient 1 | 0, 1 | 4, 5 | 4 | 180 | 145 | / | / | / | / | / |
| Patient 2 | / | 4 | 3 | 150 | 130 | 2, 3 | 7 | 3 | 150 | 130 |
| Patient 3 | / | / | 2 | 150 | 145 | 2 | 7 | 2 | 180 | 145 |
| Patient 4 | 0, 1 | 4, 5 | 4.8 | 210 | 145 | / | / | / | / | / |
| Patient 5 | 1 | 5 | 2.8 | 150 | 90 | 2 | 6 | 2.6 | 150 | 90 |
| Patient 6 | / | / | / | / | / | 2, 3 | 6, 7 | 3 | 150 | 145 |
| Patient 7 | / | / | / | / | / | 3 | 7 | 3.5 | 210 | 120 |
| Patient 8 | / | / | / | / | / | 2, 3 | 6, 7 | 4 | 150 | 120 |
| Patient 9 | / | / | / | / | / | 3 | 7 | 3.7 | 210 | 120 |
| Patient 10 | 1 | 4 | 2.6 | 90 | 130 | 3 | 6, 7 | 3.2 | 180 | 130 |
| Patient 11 | / | / | / | / | / | / | 6, 7 | 2.6 | 210 | 130 |

“/”: Inactive contacts. NAc: nucleus accumbens; ALIC: anterior limb of the internal capsule.

**Supplementary Table 2: The programming parameters at 6 months after stimulation**

|  | **Stimulation time** | **NAc** | | | | | **ALIC** | | | | |
| --- | --- | --- | --- | --- | --- | --- | --- | --- | --- | --- | --- |
| **Left**  **Active Contacts** | **Right Active**  **Contacts** | **Amplitude (V)** | **Pulse Width**  **(μs)** | **Frequency(Hz)** | **Left**  **Active Contacts** | **Right Active**  **Contacts** | **Amplitude (V)** | **Pulse Width**  **(μs)** | **Frequency(Hz)** |
| Patient 1 | 07:00-22:00 | 0, 1 | 4, 5 | 4 | 180 | 145 | / | / | / | / | / |
| Patient 2 | 07:30-11:30 | / | / | / | / | / | 2 | 6, 7 | 1.8 | 60 | 100 |
| Patient 3 | 08:00-21:00 | 1 | / | 0.3 | 60 | 60 | 2 | 7 | 2.7 | 180 | 145 |
| 0:00-6:00 | / | / | / | / | / | 3 | 7 | 05 | 60 | 30 |
| Patient 4 | 06:00-22:00 | 0, 1 | 4, 5 | 4.65 | 210 | 130 | / | / | / | / | / |
| Patient 5 | 08:00-22:30 | 1 | 5 | 3.6 | 180 | 145 | 2 | 6 | 3.2 | 180 | 145 |
| Patient 6 | 08:00-22:30 | / | / | / | / | / | / | 6, 7 | 2 | 150 | 90 |
| 0.00-6:00 | / | / | / | / | / | / | 6 , 7 | 3 | 30 | 10 |
| Patient 7 | 09:00-19:30 | 1 | 5 | 0.3 | 90 | 40 | 3 | 7 | 3.85 | 210 | 120 |
| 19:30-23:00 | 1 | 5 | 0.6 | 60 | 90 |  | / | / | / | / |
| 23:00-09:00 | / | / | / | / | / | 3 | 7 | 0.5 | 210 | 120 |
| Patient 8 | / | / | / | / | / | / | / | / | / | / | / |
| Patient 9 | 19:30-24:00 | / | / | / | / | / | 3 | 7 | 0.4 | 40 | 10 |
| 07:30-11:30 | / | / | / | / | / | 3 | 6, 7 | 2.25 | 60 | 120 |
| 14:00-17:30 | 1 | 5 | 0.55 | 60 | 90 | / | / | / | / | / |
| Patient 10 | 07:00-22:00 | 0 | 4 | 1.8 | 150 | 90 | 3 | 7 | 2.65 | 150 | 130 |
| Patient 11 | 07:00-21:30 | / | / | / | / | / | 2, 3 | 6, 7 | 3.3 | 280 | 130 |

“/”: Inactive contacts. NAc: nucleus accumbens; ALIC: anterior limb of the internal capsule. Note: Some patients utilized adjustable stimulation parameter combinations.

**Supplementary Table 3: Detailed neuropsychological test results in 4 visits**

|  | **Baseline** | **1 Month** | **3 Months** | **6 Months** | **Statistical test value** |
| --- | --- | --- | --- | --- | --- |
| **CARS** |  |  |  |  |  |
| Total CARS | 44.5 [41.0-46.5] | 41.0 [40.5-45.5] | 37.5 [35.5-42.0] | 35.0 [33.0-42.0] | χ² = 27.6, p < 0.001 |
| Relationship to people | 3.5 [3.0-3.5] | 3.3 [3.0-3.5] | 3.0 [2.5-3.0] | 2.5 [2.5-3.0] | χ² = 17.0, p < 0.001 |
| Imitation | 3.0 [3.0-3.5] | 3.0 [3.0-3.5] | 2.5 [2.5-3.0] | 2.5 [2.0-2.5] | χ² = 23.5, p < 0.001 |
| Emotional response | 3.0 [2.5-3.5] | 2.5 [2.0-3.0] | 2.5 [2.0-2.5] | 2.5 [2.0-2.5] | χ² = 16.8, p < 0.001 |
| Body use | 3.0 [3.0-3.0] | 2.5 [2.5-3.0] | 2.5 [2.0-3.0] | 2.5 [1.5-3.0] | χ² = 17.3, p < 0.001 |
| Object use | 3.0 [3.0-3.0] | 3.0 [2.5-3.0] | 2.5 [2.5-3.0] | 2.5 [2.5-3.0] | χ² = 10.5, p = 0.013 |
| Adaptation to change | 2.0 [2.5-3.0] | 2.5 [2.0-3.0] | 2.0 [1.5-2.5] | 2.0 [1.5-2.5] | χ² = 12.9, p = 0.001 |
| Visual response | 3.0 [2.5-3.0] | 3.0 [2.5-3.0] | 2.5 [2.0-3.0] | 2.0 [2.0-2.5] | χ² = 20.3, p < 0.001 |
| Listening response | 2.0 [1.0-3.0] | 1.5 [1.0-2.0] | 1.5 [1.0-2.0] | 1.5 [1.0-1.5] | χ² = 13.3, p < 0.001 |
| Taste-smell-touch response and use | 2.0 [1.0-3.0] | 2.0 [1.0-3.0] | 1.5 [1.0-3.0] | 1.5 [1.0-2.5] | χ² = 7.2, p = 0.079 |
| Fear and nervousness | 3.0 [2.0-3.0] | 2.5 [2.0-3.0] | 2.0 [1.5-2.5] | 2.0 [1.5-2.5] | χ² = 19.2, p < 0.001 |
| Verbal communication | 3.5 [3.5-3.5] | 3.5 [3.5-3.5] | 3.0 [3.0-3.5] | 3.0 [2.5-3.0] | χ² = 17.7, p < 0.001 |
| Non-verbal communication | 3.0 [2.5-3.5] | 3.0 [2.5-3.5] | 3.0 [2.5-3.0] | 2.5 [2.5-3.0] | χ² = 10.9, p = 0.006 |
| Activity level | 3.0 [2.5-3.5] | 2.5 [2.0-3.5] | 2.5 [2.0-3.0] | 2.5 [2.0-3.5] | χ² = 17.5, p < 0.001 |
| Level and consistency of intellectual response | 4.0 [3.5-4.0] | 4.0[3.5-4.0] | 3.5 [3.5-4.0] | 3.5 [3.0-3.5] | χ² = 14.4, p = 0.002 |
| General impressions | 3.5 [3.5-4.0] | 3.5[3.5-4.0] | 3.5 [3.0-3.5] | 3.0 [3.0-3.5] | χ² = 15.5, p < 0.001 |
| **AuBC** |  |  |  |  |  |
| Total AuBC | 85.0 [68.0-99.0] | 72.0 [50.0-91.0] | 47.0 [34.0-71.0] | 49.0 [35.0-60.0] | χ² = 14.4, p = 0.001 |
| Sensory | 15.0 [10.0-17.0] | 10.0 [7.0-22.0] | 8.0 [5.0-10.0] | 4.0 [3.0-13.0] | χ² = 8.1, p = 0.036 |
| Social Interaction | 22.0 [12.0-23.0] | 17.0 [12.0-22.0] | 12.0 [4.0-19.0] | 9.0 [4.0-15.0] | χ² = 16.1, p < 0.001 |
| Motor Skills | 14.0 [3.0-29.0] | 11.0 [3.0-17.0] | 4.0 [3.0-10.0] | 11.0 [0.0-14.0] | χ² = 9.3, p = 0.020 |
| Language | 17.0 [15.0-24.0] | 15.0 [11.0-23.0] | 14.0 [11.0-16.0] | 14.0 [12.0-16.0] | χ² = 8.4, p = 0.035 |
| Self-care | 15.0 [12.0-18.0] | 13.0 [9.0-17.0] | 14.0 [4.0-15.0] | 9.0 [5.0-16.0] | χ² = 4.5, p = 0.217 |
| **ATEC** |  |  |  |  |  |
| Total ATEC | 88.0 [64.0-102.0] | 70.0 [62.0-91.0] | 62.0 [57.0-75.0] | 56.0 [47.0-81.0] | χ² = 8.6, p = 0.028 |
| Speech/Language/Communication | 16.0 [11.0-19.0] | 13.0 [10.0-18.0] | 13.0 [9.0-18.0] | 10.0 [8.0-17.0] | χ² = 7.7, p = 0.045 |
| Social/Relating | 21.0 [18.0-30.0] | 21.0 [18.0-24.0] | 18.0 [12.0-23.0] | 16.0 [11.0-18.0] | χ² = 9.9, p = 0.017 |
| Sensory/Cognitive Awareness | 18.0 [13.0-23.0] | 21.0 [16.0-25.0] | 21.0 [12.0-23.0] | 17.0 [11.0-21.0] | χ² = 6.2, p = 0.099 |
| Health/Physical Behavior | 22.0 [18.0-34.0] | 20.0 [11.0-23.0] | 16.0 [10.0-26.0] | 18.0 [6.0-27.0] | χ² = 9.1, p = 0.023 |
| **AbBC** |  |  |  |  |  |
| Total AbBC | 76.0 [55.0-90.0] | 52.0 [42.0-85.0] | 52.0 [20.0-69.0] | 46.0 [27.0-70.0] | χ² = 5.2, p = 0.155 |
| **RBS-R** |  |  |  |  |  |
| Total RBS-R | 28.0 [22.0-48.0] | 24.0 [10.0-38.0] | 10.0 [6.0-28.0] | 15.0 [3.0-40.0] | χ² = 6.6, p = 0.089 |
| Stereotyped Behaviors | 7.0 [4.0-10.0] | 3.0 [3.0-7.0] | 3.0 [0.0-7.0] | 4.0 [0.0-6.0] | χ² = 6.9, p = 0.078 |
| Self-Injurious Behavior | 3.0 [1.0-6.0] | 2.0 [0.0-4.0] | 1.0 [0.0-6.0] | 1.0 [0.0-5.0] | χ² = 5.8, p = 0.120 |
| Compulsive Behaviors | 5.0 [2.0-9.5] | 2.0 [0.0-6.0] | 1.0 [0.0-2.0] | 1.0 [0.0-7.0] | χ² = 5.3, p = 0.151 |
| Ritualistic Behaviors | 4.0 [1.0-7.0] | 3.0 [2.0-5.0] | 2.0 [0.0-3.0] | 2.0 [0.0-3.0] | χ² = 3.2, p = 0.368 |
| Restricted Behaviors | 3.5 [0.8-6.3] | 1.0 [0.0-7.0] | 0.0 [0.0-5.0] | 0.0 [0.0-2.0] | χ² = 4.0, p = 0.274 |
| Other Repetitive Behaviors | 9.0 [6.0-13.0] | 5.0 [3.0-12.0] | 4.0 [1.0-6.0] | 3.0 [1.0-9.0] | χ² = 15.8, p < 0.001 |
| **GAF** | 15.0 [5.0-15.0] | 15.0 [10.0-20.0] | 20.0 [15.0-25.0] | 25.0 [10.0-30.0] | χ² = 21.1, p < 0.001 |
| **CGI-SI** | 7.0 [7.0-7.0] | 7.0 [7.0-7.0] | 6.0 [6.0-7.0] | 6.0 [5.0-7.0] | χ² = 20.7, p < 0.001 |
| **CGI-GI** | / | 3.0 [2.0-3.0] | 3.0 [2.0-3.0] | 2.0 [2.0-3.0] | χ² = 2.0, p = 0.500 |

CARS: Childhood Autism Rating Scale; AuBC: Autism Behavior Checklist; ATEC: Autism Treatment Evaluation Checklist; AbBC:Aberrant Behavior Checklist; RBS-R: Repetitive Behavior Scale–Revised; GAF: Global Assessment of Function; CGI-SI:Clinical Global Impression-Severity of Illness; CGI-GI: Clinical Global Impression-Global Improvement.

Values shown as median [IQR] due to non-normal distribution.

“/”: CGI-GI reflects the patient's improvement relative to baseline, so baseline data is not applicable.

**Supplementary Table 4: Baseline Characteristics and 6-month outcomes after surgery.**

|  | Sex | Age (years) | Duration of disease (years) | Dominant hand | Medical complications before surgery | Drugs before surgery | Other Treatment before surgery | Medical complications after surgery | Drugs after surgery | Other Treatment after surgery |
| --- | --- | --- | --- | --- | --- | --- | --- | --- | --- | --- |
| Patient 1 | Female | 9.00 | 7.00 | Right | Seizures | Aripiprazole, Atomoxetine, Tretinoin, Sodium Valproate | Rehabilitation training in special education institutions (individual training course, group training course, sensory integration therapy) | None | Aripiprazole | Rehabilitation training in special education institutions (individual training course, group training course, sensory integration therapy, social therapy) |
| Patient 2 | Male | 14.00 | 11.00 | Right | Seizures | Benzatropine, Sodium Valproate | Study in special education school | None | Magnesium Succinic Acid | Study in special education school |
| Patient 3 | Male | 17.00 | 14.00 | Right | None | Risperidone, Sodium Valproate, Olanzapine | None | None | Risperidone, Sodium Valproate | None |
| Patient 4 | Female | 10.00 | 6.00 | Right | Seizures | Aripiprazole, Topiramate | Rehabilitation training in special education institutions ( individual training course) | None | Aripiprazole, Topiramate | None |
| Patient 5 | Male | 15.00 | 13.00 | Right | None | None | Study in special education school | None | Olanzapine | None |
| Patient 6 | Male | 16.00 | 13.00 | Right | None | None | Study in special education school | None | Olanzapine | None |
| Patient 7 | Female | 9.00 | 8.00 | Right | Seizures | Olanzapine, Aripiprazole, Risperidone, Sodium Valproate | Study in special education school | None | Sodium Valproate | Study in special education school and Rehabilitation training in special education institutions (individual training course, sensory integration therapy, social therapy) |
| Patient 8 | Male | 12.00 | 11.00 | Right | None | None | Rehabilitation training in the rehabilitation department of the hospital | / | / | / |
| Patient 9 | Female | 11.00 | 10.00 | Right | None | Aripiprazole | Rehabilitation training in special education institutions (individual training course, sensory integration therapy) | None | Vitamins，Progesterone | Rehabilitation training in special education institutions (individual training course, sensory integration therapy, social therapy) |
| Patient 10 | Female | 13.00 | 12.00 | Left | None | Aripiprazole | Rehabilitation training in special education institutions (individual training course, sensory integration therapy) | None | None | Rehabilitation training in special education institutions (individual training course, sensory integration therapy) |
| Patient 11 | Male | 7.00 | 5.00 | Right | None | None | None | None | Vitamins | Rehabilitation training in special education institutions (individual training course, linguistic training) |
